# Supplementary material for: Antioxidant and Antimicrobial Properties of Helichrysum italicum (Roth) G. Don Hydrosol
Source: MDPI journal article supplement (doi:10.3390/antibiotics11081017), 2022-07-28
Supplement: s1 [file s1]

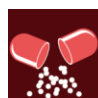

## Supplementary File

Table S1. Chemical constituents of *Helichrysum italicum* (Roth) G. Don essential oil.

| No. | Compound                                             | Area percentage (%) |
|-----|------------------------------------------------------|---------------------|
| 1.  | <b><math>\alpha</math>-pinene</b>                    | <b>5.6</b>          |
| 2.  | $\alpha$ -fenchene                                   | 0.1                 |
| 3.  | $\beta$ -pinene                                      | 0.3                 |
| 4.  | limonene                                             | 2.0                 |
| 5.  | 1,8-cineol                                           | 0.5                 |
| 6.  | $\gamma$ -terpinene                                  | 0.5                 |
| 7.  | linalool                                             | 0.4                 |
| 8.  | 2-methylbutyl-2-methylbutanoate                      | 0.3                 |
| 9.  | nerol                                                | 0.3                 |
| 10. | <b>neryl acetate</b>                                 | <b>10.8</b>         |
| 11. | $\alpha$ -copaene                                    | 2.6                 |
| 12. | italicene                                            | 3.1                 |
| 13. | <i>cis</i> - $\alpha$ -bergamotene                   | 0.9                 |
| 14. | <b><i>trans</i>-<math>\beta</math>-caryophyllene</b> | <b>8.4</b>          |
| 15. | <i>trans</i> - $\alpha$ -bergamotene                 | 0.9                 |
| 16. | 4,6,9-trimethyldec-8-ene-3,5-dione                   | 3.3                 |
| 17. | neryl propionate                                     | 2.0                 |
| 18. | $\gamma$ -selinene                                   | 2.4                 |
| 19. | <b><math>\gamma</math>-curcumene</b>                 | <b>18.1</b>         |
| 20. | <b>ar-curcumene</b>                                  | <b>5.8</b>          |
| 21. | <b><math>\beta</math>-selinene</b>                   | <b>9.9</b>          |
| 22. | 2,4,6,9-tetramethyldec-8-ene-3,5-dione               | 2.4                 |
| 23. | <b><math>\alpha</math>-selinene</b>                  | <b>6.9</b>          |
| 24. | $\alpha$ -muurolene                                  | 0.5                 |
| 25. | $\gamma$ -cadinene                                   | 0.4                 |
| 26. | $\delta$ -cadinene                                   | 1.7                 |
| 27. | 3,5,7,10-tetramethylundec-9-ene-4,6-dione            | 0.9                 |

Bold means the highest percentage of the essential oil compounds.
